# Supplementary material for: Dairy-Inspired Coatings for Bone Implants from Whey Protein Isolate-Derived Self-Assembled Fibrils
Source: MDPI journal article supplement (doi:10.3390/ijms21155544), 2020-08-03
Supplement: s1 [file s1]

## Supplementary data

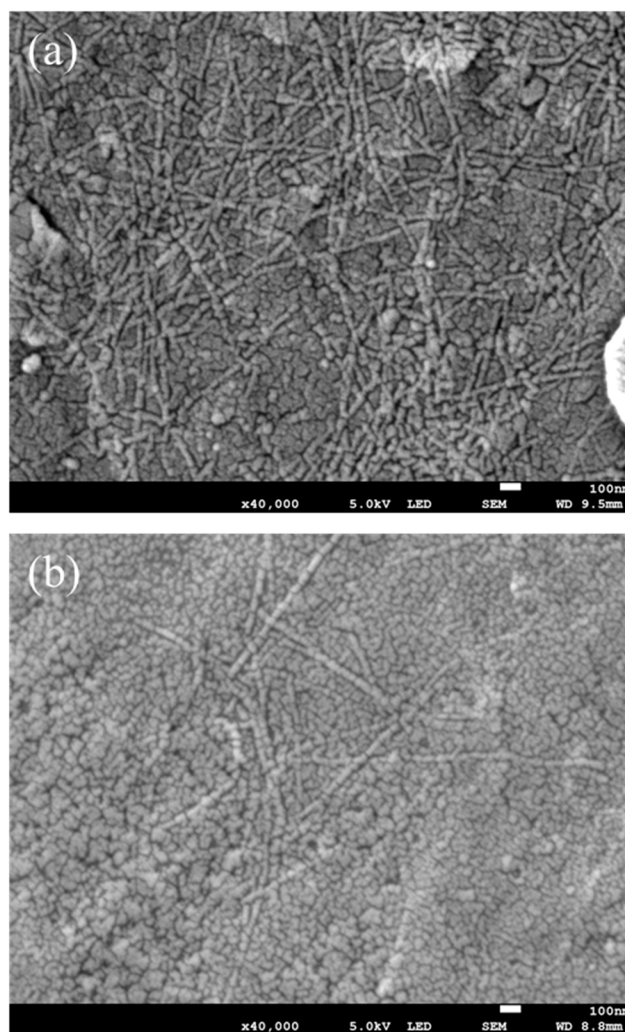

**Figure S1.** (a) SEM images of fibrillar coatings obtained from WPI solutions at (a) pH 2 and (b) pH 3.5 after autoclaving (magnification:  $\times 40000$ ; scale bar: 100 nm).
